# Supplementary material
Source: publisher site journal article supplement (http://kjim.org/upload/media/kjim-2023-184-Supplementary-Fig-2.pdf)
Supplement: Supplementary file 1 [file kjim-2023-184-Supplementary-Fig-2.pdf]

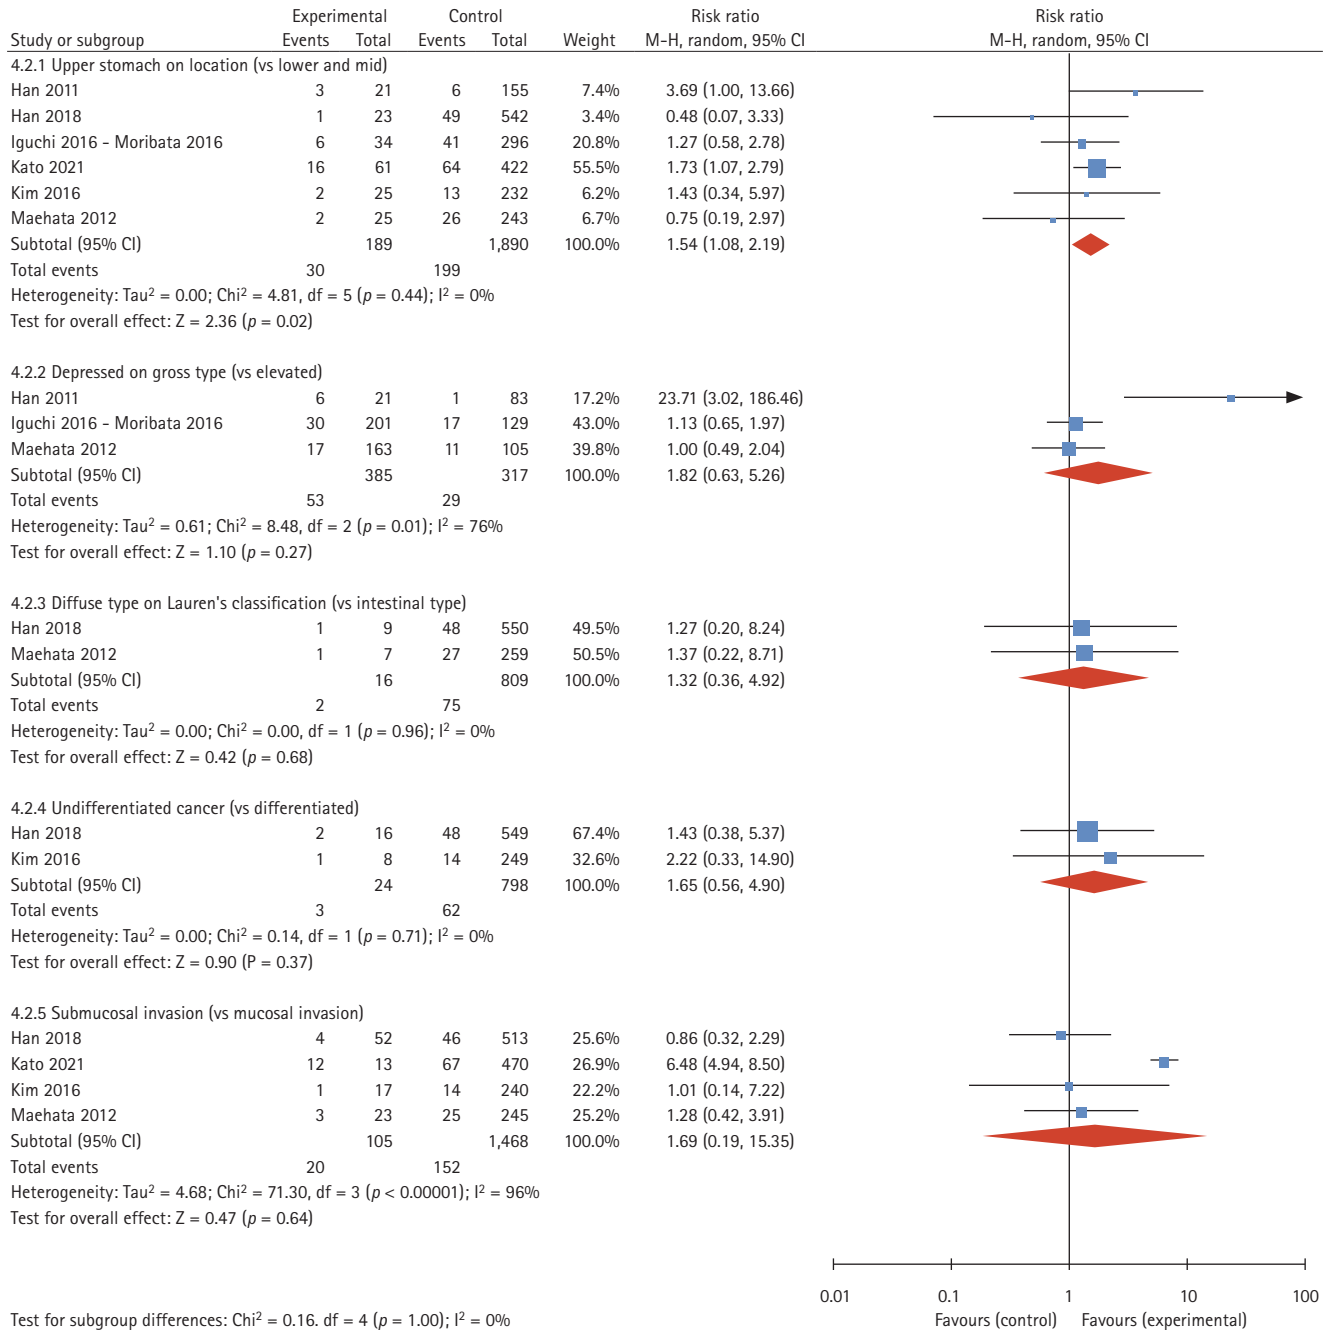

**Supplementary Figure 2.** Forest plot on occurrence of metachronous gastric cancer after endoscopic resection showing effects of characteristics of early gastric cancer at baseline.
